# Supplementary material for: Brachypodium distachyon Seedlings Display Accession-Specific Morphological and Transcriptomic Responses to the Microgravity Environment of the International Space Station
Source: MDPI journal article supplement (doi:10.3390/life13030626), 2023-02-23
Supplement: s1 [file s1]

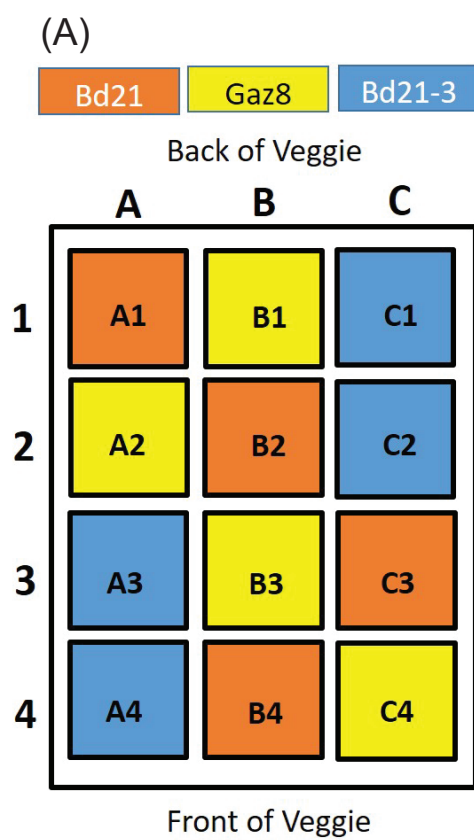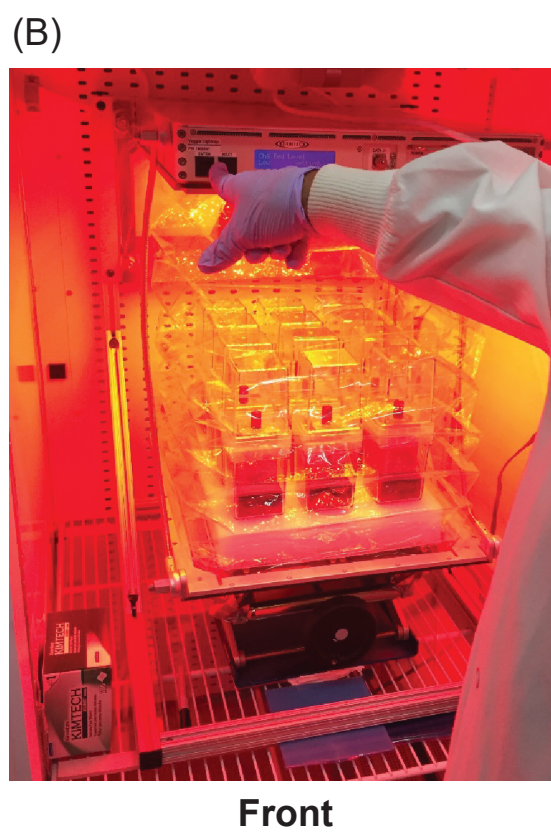

Supplemental Figure S1.

| GO_acc     | Term                                            | Bd21    |                        | Bd21-3  |                       | Gaz8    |                        |
|------------|-------------------------------------------------|---------|------------------------|---------|-----------------------|---------|------------------------|
|            |                                                 | FDR     |                        | FDR     |                       | FDR     |                        |
| GO:0055114 | oxidation-reduction process                     | 5.6E-38 | Total 1%<br>Query 26%  | 2.9E-06 | Total 1%<br>Query 22% | 1.2E-13 | Total 1%<br>Query 22%  |
| GO:0008152 | metabolic process                               | 1.4E-04 | Total 35%<br>Query 54% |         |                       | 1.8E-21 | Total 35%<br>Query 70% |
| GO:0006468 | protein phosphorylation                         | 9.1E-03 | Total 1%<br>Query 6%   |         |                       | 4.1E-02 | Total 1%<br>Query 4%   |
| GO:0006979 | response to oxidative stress                    | 5.4E-09 | Total 1%<br>Query 10%  |         |                       | 3.7E-04 | Total 1%<br>Query 5%   |
| GO:0006950 | response to stress                              | 2.0E-02 | Total 5%<br>Query 12%  |         |                       |         |                        |
| GO:0044710 | single-organism metabolic process               | 7.4E-10 | Total 11%<br>Query 31% |         |                       |         |                        |
| GO:0006518 | peptide metabolic process                       |         |                        |         |                       | 5.7E-61 | Total 3%<br>Query 39%  |
| GO:0043043 | peptide biosynthetic process                    |         |                        |         |                       | 4.9E-66 | Total 2%<br>Query 39%  |
| GO:0044267 | cellular protein metabolic process              |         |                        |         |                       | 8.0E-39 | Total 8%<br>Query 44%  |
| GO:0006807 | nitrogen compound metabolic process             |         |                        |         |                       | 1.0E-17 | Total 19%<br>Query 47% |
| GO:0009058 | biosynthetic process                            |         |                        |         |                       | 6.1E-18 | Total 17%<br>Query 45% |
| GO:0043603 | cellular amide metabolic process                |         |                        |         |                       | 4.7E-60 | Total 3%<br>Query 39%  |
| GO:0044238 | primary metabolic process                       |         |                        |         |                       | 2.1E-12 | Total 29%<br>Query 54% |
| GO:1901566 | organonitrogen compound biosynthetic process    |         |                        |         |                       | 2.2E-49 | Total 4%<br>Query 40%  |
| GO:0044237 | cellular metabolic process                      |         |                        |         |                       | 1.2E-10 | Total 30%<br>Query 53% |
| GO:1901576 | organic substance biosynthetic process          |         |                        |         |                       | 2.1E-19 | Total 16%<br>Query 45% |
| GO:0044249 | cellular biosynthetic process                   |         |                        |         |                       | 1.5E-20 | Total 16%<br>Query 45% |
| GO:0071704 | organic substance metabolic process             |         |                        |         |                       | 4.2E-10 | Total 32%<br>Query 55% |
| GO:0044271 | cellular nitrogen compound biosynthetic process |         |                        |         |                       | 1.3E-28 | Total 12%<br>Query 44% |
| GO:0034645 | cellular macromolecule biosynthetic process     |         |                        |         |                       | 1.3E-28 | Total 12%<br>Query 44% |
| GO:0044260 | cellular macromolecule metabolic process        |         |                        |         |                       | 2.7E-20 | Total 21%<br>Query 52% |
| GO:0034641 | cellular nitrogen compound metabolic process    |         |                        |         |                       | 8.4E-19 | Total 18%<br>Query 46% |
| GO:0010467 | gene expression                                 |         |                        |         |                       | 2.8E-27 | Total 13%<br>Query 45% |
| GO:0043170 | macromolecule metabolic process                 |         |                        |         |                       | 6.5E-20 | Total 23%<br>Query 54% |
| GO:0043604 | amide biosynthetic process                      |         |                        |         |                       | 1.2E-65 | Total 3%<br>Query 39%  |
| GO:0019538 | protein metabolic process                       |         |                        |         |                       | 7.3E-39 | Total 9%<br>Query 46%  |
| GO:0009059 | macromolecule biosynthetic process              |         |                        |         |                       | 4.8E-28 | Total 12%<br>Query 44% |
| GO:0006412 | translation                                     |         |                        |         |                       | 4.9E-66 | Total 2%<br>Query 39%  |
| GO:0009987 | cellular process                                |         |                        |         |                       | 4.3E-06 | Total 38%<br>Query 56% |
| GO:1901564 | organonitrogen compound metabolic process       |         |                        |         |                       | 3.6E-41 | Total 6%<br>Query 41%  |

Supplemental Figure S2.

| GO_acc     | Term                                            | Bd21    |                                                                                         |     | Bd21-3  |                                                                                          |     | Gaz8    |                                                                                           |     |
|------------|-------------------------------------------------|---------|-----------------------------------------------------------------------------------------|-----|---------|------------------------------------------------------------------------------------------|-----|---------|-------------------------------------------------------------------------------------------|-----|
|            |                                                 | FDR     |                                                                                         |     | FDR     |                                                                                          |     | FDR     |                                                                                           |     |
| GO:0008152 | metabolic process                               | 2.3E-02 | Total  | 35% | 3.4E-05 | Total  | 35% | 5.7E-03 | Total  | 35% |
|            |                                                 |         | Query  | 56% |         | Query  | 59% |         | Query  | 56% |
| GO:0055114 | oxidation-reduction process                     | 8.8E-03 | Total  | 1%  | 6.7E-12 | Total   | 1%  | 8.7E-11 | Total  | 1%  |
|            |                                                 |         | Query  | 9%  |         | Query   | 17% |         | Query  | 17% |
| GO:0016310 | phosphorylation                                 | 1.5E-05 | Total  | 2%  |         |                                                                                          |     |         |                                                                                           |     |
|            |                                                 |         | Query  | 17% |         |                                                                                          |     |         |                                                                                           |     |
| GO:0006468 | protein phosphorylation                         | 1.5E-02 | Total  | 1%  |         |                                                                                          |     |         |                                                                                           |     |
|            |                                                 |         | Query  | 17% |         |                                                                                          |     |         |                                                                                           |     |
| GO:0006793 | phosphorus metabolic process                    | 2.9E-03 | Total  | 4%  |         |                                                                                          |     |         |                                                                                           |     |
|            |                                                 |         | Query  | 17% |         |                                                                                          |     |         |                                                                                           |     |
| GO:0006464 | cellular protein modification process           | 1.5E-02 | Total  | 5%  |         |                                                                                          |     |         |                                                                                           |     |
|            |                                                 |         | Query  | 17% |         |                                                                                          |     |         |                                                                                           |     |
| GO:0043412 | macromolecule modification                      | 2.8E-02 | Total  | 6%  |         |                                                                                          |     |         |                                                                                           |     |
|            |                                                 |         | Query  | 17% |         |                                                                                          |     |         |                                                                                           |     |
| GO:0036211 | protein modification process                    | 1.5E-02 | Total  | 5%  |         |                                                                                          |     |         |                                                                                           |     |
|            |                                                 |         | Query  | 17% |         |                                                                                          |     |         |                                                                                           |     |
| GO:0006796 | phosphate-containing compound metabolic process | 2.9E-03 | Total  | 4%  |         |                                                                                          |     |         |                                                                                           |     |
|            |                                                 |         | Query  | 17% |         |                                                                                          |     |         |                                                                                           |     |
| GO:0044710 | single-organism metabolic process               |         |                                                                                         |     |         |                                                                                          |     | 7.8E-04 | Total  | 11% |
|            |                                                 |         |                                                                                         |     |         |                                                                                          |     |         | Query  | 28% |

Supplemental Figure S3.

| GO_acc     | Term                                                   | Bd21    |                     | Bd21-3  |                     | Gaz8    |                     |
|------------|--------------------------------------------------------|---------|---------------------|---------|---------------------|---------|---------------------|
|            |                                                        | FDR     |                     | FDR     |                     | FDR     |                     |
| GO:0016310 | phosphorylation                                        | 3.8E-03 | Total Query 2% 5%   | 5.0E-07 | Total Query 2% 20%  | 8.4E-25 | Total Query 2% 8%   |
| GO:0006796 | phosphate-containing compound metabolic process        | 4.8E-03 | Total Query 4% 8%   | 2.4E-05 | Total Query 4% 22%  | 6.7E-18 | Total Query 4% 11%  |
| GO:0008152 | metabolic process                                      | 3.8E-25 | Total Query 35% 63% | 2.4E-06 | Total Query 35% 73% | 3.9E-44 | Total Query 35% 59% |
| GO:0055114 | oxidation-reduction process                            | 2.2E-40 | Total Query 1% 15%  | 4.7E-04 | Total Query 1% 12%  | 5.9E-54 | Total Query 1% 11%  |
| GO:0006793 | phosphorus metabolic process                           | 1.5E-03 | Total Query 4% 8%   | 2.4E-05 | Total Query 4% 22%  | 8.8E-18 | Total Query 4% 11%  |
| GO:0044710 | single-organism metabolic process                      | 1.2E-12 | Total Query 11% 25% | 4.6E-03 | Total Query 11% 29% | 1.5E-11 | Total Query 11% 19% |
| GO:0009116 | nucleoside metabolic process                           | 2.3E-02 | Total Query 1% 3%   |         |                     | 1.7E-02 | Total Query 1% 2%   |
| GO:0042278 | purine nucleoside metabolic process                    | 7.1E-03 | Total Query 1% 3%   |         |                     | 2.3E-02 | Total Query 1% 2%   |
| GO:0009167 | purine ribonucleoside monophosphate metabolic process  | 6.8E-03 | Total Query 1% 3%   |         |                     | 3.6E-03 | Total Query 1% 2%   |
| GO:0006091 | generation of precursor metabolites and energy         | 1.7E-17 | Total Query 1% 9%   |         |                     | 1.1E-10 | Total Query 1% 4%   |
| GO:0006753 | nucleoside phosphate metabolic process                 | 1.6E-02 | Total Query 1% 3%   |         |                     | 2.1E-02 | Total Query 1% 2%   |
| GO:0019693 | ribose phosphate metabolic process                     | 8.6E-03 | Total Query 1% 3%   |         |                     | 3.2E-02 | Total Query 1% 2%   |
| GO:0009765 | photosynthesis, light harvesting                       | 1.0E-17 | Total Query 0% 4%   |         |                     | 1.1E-12 | Total Query 0% 2%   |
| GO:0009144 | purine nucleoside triphosphate metabolic process       | 4.8E-03 | Total Query 1% 3%   |         |                     | 1.6E-03 | Total Query 1% 2%   |
| GO:0015979 | photosynthesis                                         | 2.6E-42 | Total Query 1% 14%  |         |                     | 1.3E-34 | Total Query 1% 7%   |
| GO:0046034 | ATP metabolic process                                  | 3.8E-03 | Total Query 1% 3%   |         |                     | 8.7E-04 | Total Query 1% 2%   |
| GO:0009205 | purine ribonucleoside triphosphate metabolic process   | 4.8E-03 | Total Query 1% 3%   |         |                     | 1.5E-03 | Total Query 1% 2%   |
| GO:0019684 | photosynthesis, light reaction                         | 5.5E-18 | Total Query 0% 6%   |         |                     | 2.7E-12 | Total Query 0% 3%   |
| GO:0009141 | nucleoside triphosphate metabolic process              | 8.6E-03 | Total Query 1% 3%   |         |                     | 6.3E-03 | Total Query 1% 2%   |
| GO:0009199 | ribonucleoside triphosphate metabolic process          | 7.5E-03 | Total Query 1% 3%   |         |                     | 4.6E-03 | Total Query 1% 2%   |
| GO:0006163 | purine nucleotide metabolic process                    | 8.2E-03 | Total Query 1% 3%   |         |                     | 2.9E-02 | Total Query 1% 2%   |
| GO:0046128 | purine ribonucleoside metabolic process                | 6.8E-03 | Total Query 1% 3%   |         |                     | 2.0E-02 | Total Query 1% 2%   |
| GO:0055085 | transmembrane transport                                | 1.6E-02 | Total Query 3% 6%   |         |                     | 1.4E-04 | Total Query 3% 6%   |
| GO:0009161 | ribonucleoside monophosphate metabolic process         | 1.2E-02 | Total Query 1% 3%   |         |                     | 1.2E-02 | Total Query 1% 2%   |
| GO:0009126 | purine nucleoside monophosphate metabolic process      | 6.8E-03 | Total Query 1% 3%   |         |                     | 3.6E-03 | Total Query 1% 2%   |
| GO:0009150 | purine ribonucleotide metabolic process                | 6.8E-03 | Total Query 1% 3%   |         |                     | 2.1E-02 | Total Query 1% 2%   |
| GO:0009123 | nucleoside monophosphate metabolic process             | 1.3E-02 | Total Query 1% 3%   |         |                     | 1.4E-02 | Total Query 1% 2%   |
| GO:0044267 | cellular protein metabolic process                     |         |                     | 1.9E-02 | Total Query 8% 22%  | 1.7E-11 | Total Query 8% 16%  |
| GO:0071704 | organic substance metabolic process                    |         |                     | 7.6E-03 | Total Query 32% 55% | 2.4E-05 | Total Query 32% 40% |
| GO:0006468 | protein phosphorylation                                |         |                     | 4.5E-08 | Total Query 1% 20%  | 8.7E-25 | Total Query 1% 7%   |
| GO:0019538 | protein metabolic process                              |         |                     | 3.8E-03 | Total Query 9% 27%  | 5.6E-20 | Total Query 9% 20%  |
| GO:0006464 | cellular protein modification process                  |         |                     | 1.4E-03 | Total Query 5% 20%  | 9.7E-04 | Total Query 5% 8%   |
| GO:0043412 | macromolecule modification                             |         |                     | 3.6E-03 | Total Query 6% 20%  | 9.7E-04 | Total Query 6% 9%   |
| GO:0036211 | protein modification process                           |         |                     | 1.4E-03 | Total Query 5% 20%  | 9.7E-04 | Total Query 5% 8%   |
| GO:0009259 | ribonucleotide metabolic process                       | 1.3E-02 | Total Query 1% 3%   |         |                     |         |                     |
| GO:0009117 | nucleotide metabolic process                           | 1.6E-02 | Total Query 1% 3%   |         |                     |         |                     |
| GO:0009119 | ribonucleoside metabolic process                       | 1.6E-02 | Total Query 1% 3%   |         |                     |         |                     |
| GO:0072521 | purine-containing compound metabolic process           | 2.2E-02 | Total Query 1% 3%   |         |                     |         |                     |
| GO:0022900 | electron transport chain                               | 8.6E-03 | Total Query 0% 2%   |         |                     |         |                     |
| GO:0006518 | peptide metabolic process                              |         |                     |         |                     | 5.0E-10 | Total Query 3% 8%   |
| GO:1901566 | organonitrogen compound biosynthetic process           |         |                     |         |                     | 2.2E-11 | Total Query 4% 10%  |
| GO:0044237 | cellular metabolic process                             |         |                     |         |                     | 1.5E-07 | Total Query 30% 39% |
| GO:0006265 | DNA topological change                                 |         |                     |         |                     | 4.3E-03 | Total Query 0% 1%   |
| GO:0015977 | carbon fixation                                        |         |                     |         |                     | 3.1E-03 | Total Query 0% 1%   |
| GO:0043170 | macromolecule metabolic process                        |         |                     |         |                     | 2.3E-02 | Total Query 23% 27% |
| GO:0055086 | nucleobase-containing small molecule metabolic process |         |                     |         |                     | 1.2E-02 | Total Query 1% 3%   |
| GO:0006412 | translation                                            |         |                     |         |                     | 3.7E-13 | Total Query 2% 8%   |
| GO:0009987 | cellular process                                       |         |                     |         |                     | 4.5E-04 | Total Query 38% 45% |
| GO:0009132 | nucleoside diphosphate metabolic process               |         |                     |         |                     | 1.1E-02 | Total Query 0% 1%   |
| GO:0043043 | peptide biosynthetic process                           |         |                     |         |                     | 4.0E-13 | Total Query 2% 8%   |
| GO:0043603 | cellular amide metabolic process                       |         |                     |         |                     | 1.9E-09 | Total Query 3% 8%   |
| GO:0044238 | primary metabolic process                              |         |                     |         |                     | 5.2E-07 | Total Query 29% 38% |
| GO:0006811 | ion transport                                          |         |                     |         |                     | 2.9E-02 | Total Query 2% 3%   |
| GO:0043604 | amide biosynthetic process                             |         |                     |         |                     | 8.3E-13 | Total Query 3% 8%   |
| GO:1901564 | organonitrogen compound metabolic process              |         |                     |         |                     | 1.7E-11 | Total Query 6% 13%  |

Supplemental Figure S4

| GO_acc     | Term                                                           | Bd21    |                        | Bd21-3  |                        | Gaz8    |                        |
|------------|----------------------------------------------------------------|---------|------------------------|---------|------------------------|---------|------------------------|
|            |                                                                | FDR     |                        | FDR     |                        | FDR     |                        |
| GO:0016310 | phosphorylation                                                | 4.7E-13 | Total 2%<br>Query 13%  | 5.9E-07 | Total 2%<br>Query 12%  | 4.7E-13 | Total 2%<br>Query 13%  |
| GO:0055114 | oxidation-reduction process                                    | 2.6E-14 | Total 1%<br>Query 12%  | 8.2E-13 | Total 1%<br>Query 15%  | 2.6E-14 | Total 1%<br>Query 12%  |
| GO:0006796 | phosphate-containing compound metabolic process                | 1.4E-07 | Total 4%<br>Query 14%  | 2.5E-03 | Total 4%<br>Query 12%  | 1.4E-07 | Total 4%<br>Query 14%  |
| GO:0008152 | metabolic process                                              | 9.3E-07 | Total 35%<br>Query 55% | 8.1E-09 | Total 35%<br>Query 64% | 9.3E-07 | Total 35%<br>Query 55% |
| GO:0006468 | protein phosphorylation                                        | 7.7E-16 | Total 1%<br>Query 13%  | 1.0E-08 | Total 1%<br>Query 12%  | 7.7E-16 | Total 1%<br>Query 13%  |
| GO:0006793 | phosphorus metabolic process                                   | 1.4E-07 | Total 4%<br>Query 14%  | 2.5E-03 | Total 4%<br>Query 12%  | 1.4E-07 | Total 4%<br>Query 14%  |
| GO:0006464 | cellular protein modification process                          | 1.0E-06 | Total 5%<br>Query 15%  | 2.5E-03 | Total 5%<br>Query 14%  | 1.0E-06 | Total 5%<br>Query 15%  |
| GO:0036211 | protein modification process                                   | 1.0E-06 | Total 5%<br>Query 15%  | 2.5E-03 | Total 5%<br>Query 14%  | 1.0E-06 | Total 5%<br>Query 15%  |
| GO:0043412 | macromolecule modification                                     | 4.8E-06 | Total 6%<br>Query 16%  | 9.0E-03 | Total 6%<br>Query 14%  | 4.8E-06 | Total 6%<br>Query 16%  |
| GO:0006355 | regulation of transcription, DNA-templated                     | 2.9E-02 | Total 5%<br>Query 11%  |         |                        | 2.9E-02 | Total 5%<br>Query 11%  |
| GO:0031326 | regulation of cellular biosynthetic process                    | 4.6E-02 | Total 6%<br>Query 11%  |         |                        | 4.6E-02 | Total 6%<br>Query 11%  |
| GO:0019219 | regulation of nucleobase-containing compound metabolic process | 3.9E-02 | Total 6%<br>Query 11%  |         |                        | 3.9E-02 | Total 6%<br>Query 11%  |
| GO:0044267 | cellular protein metabolic process                             | 1.7E-02 | Total 8%<br>Query 16%  |         |                        | 1.7E-02 | Total 8%<br>Query 16%  |
| GO:0010556 | regulation of macromolecule biosynthetic process               | 4.6E-02 | Total 6%<br>Query 11%  |         |                        | 4.6E-02 | Total 6%<br>Query 11%  |
| GO:0051252 | regulation of RNA metabolic process                            | 3.1E-02 | Total 6%<br>Query 11%  |         |                        | 3.1E-02 | Total 6%<br>Query 11%  |
| GO:1903506 | regulation of nucleic acid-templated transcription             | 2.9E-02 | Total 6%<br>Query 11%  |         |                        | 2.9E-02 | Total 6%<br>Query 11%  |
| GO:2001141 | regulation of RNA biosynthetic process                         | 2.9E-02 | Total 6%<br>Query 11%  |         |                        | 2.9E-02 | Total 6%<br>Query 11%  |
| GO:0009889 | regulation of biosynthetic process                             | 4.6E-02 | Total 6%<br>Query 11%  |         |                        | 4.6E-02 | Total 6%<br>Query 11%  |
| GO:0019538 | protein metabolic process                                      | 3.9E-03 | Total 9%<br>Query 18%  |         |                        | 3.9E-03 | Total 9%<br>Query 18%  |
| GO:2000112 | regulation of cellular macromolecule biosynthetic process      | 4.3E-02 | Total 6%<br>Query 11%  |         |                        | 4.3E-02 | Total 6%<br>Query 11%  |
| GO:0071704 | organic substance metabolic process                            |         |                        | 4.9E-02 | Total 32%<br>Query 45% |         |                        |
| GO:0044710 | single-organism metabolic process                              |         |                        | 3.1E-06 | Total 11%<br>Query 28% |         |                        |

Supplemental Figure S5

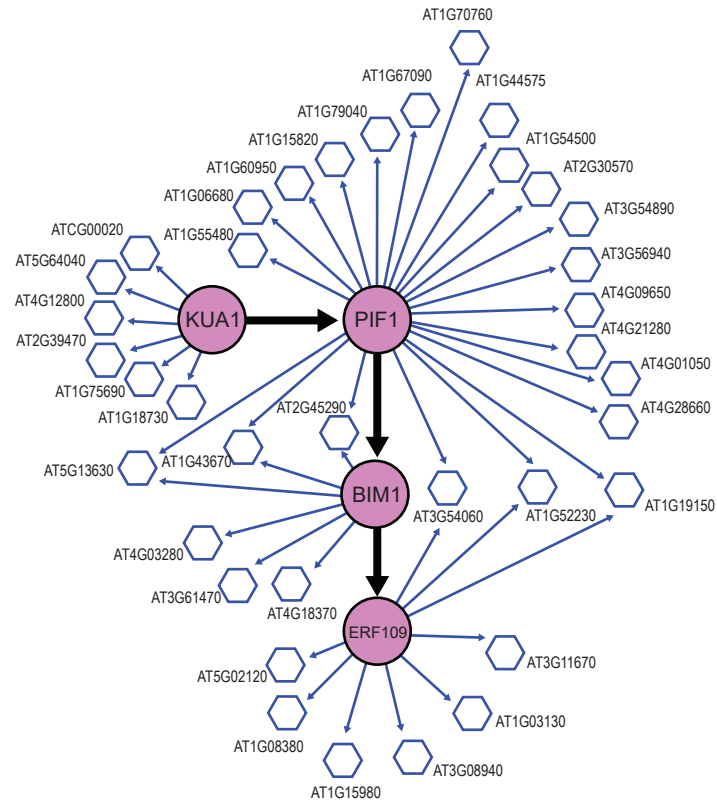

Supplemental figure S6.

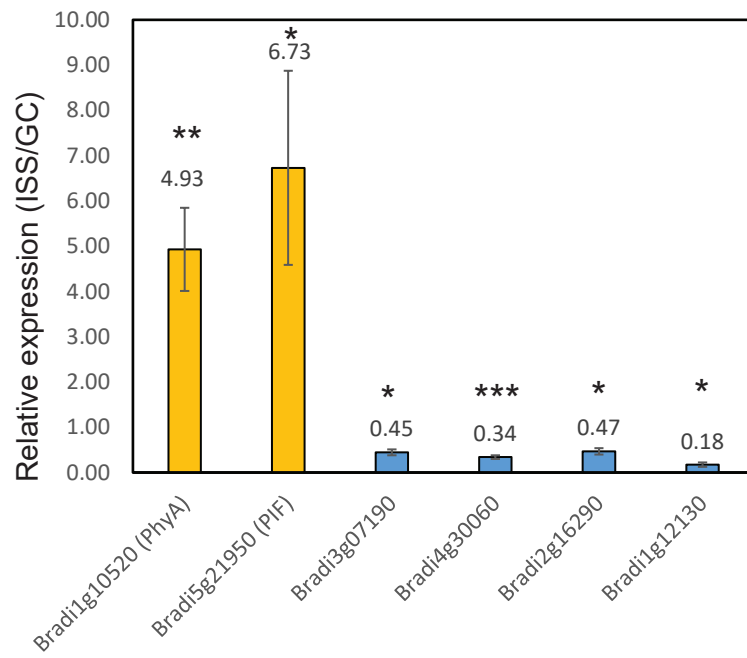

Supplemental figure S7
